# Supplementary material for: Association between Rheumatoid Arthritis and Poor Self-Perceived Oral Health in Korean Adults
Source: MDPI journal article supplement (doi:10.3390/healthcare10030427), 2022-02-24
Supplement: s1 [file s1]

## Supplementary Materials

**Table S1.** Characteristics of participants according to rheumatoid arthritis status.

|       |                                | Non-RA       | RA *      | <i>p</i> -Value |
|-------|--------------------------------|--------------|-----------|-----------------|
| Total |                                | 39,392(100)  | 794(100)  |                 |
|       | Sex                            |              |           |                 |
|       | Men                            | 17,182(43.6) | 158(19.9) | <0.0001         |
|       | Women                          | 22,210(56.4) | 636(80.1) |                 |
| Age   |                                |              |           |                 |
|       | 20–39                          | 11,512(29.2) | 62(7.81)  | <0.0001         |
|       | 40–59                          | 15,308(38.9) | 252(31.7) |                 |
|       | 60–79                          | 11,653(29.6) | 447(56.3) |                 |
|       | ≥80                            | 919(2.3)     | 33(4.2)   |                 |
|       | House Income                   |              |           |                 |
|       | Low                            | 17,009(43.2) | 458(57.7) | <0.0001         |
|       | High                           | 22,383(56.8) | 336(42.3) |                 |
|       | Education                      |              |           |                 |
|       | High school or below           | 28,198(71.6) | 698(87.9) | <0.0001         |
|       | College or above               | 11,194(28.4) | 96(12.1)  |                 |
|       | Smoking                        |              |           |                 |
|       | Non-/ex-smoker                 | 31,867(80.9) | 719(90.6) | <0.0001         |
|       | Current smoker                 | 7525(19.1)   | 75(9.5)   |                 |
|       | Diabetes mellitus              |              |           |                 |
|       | No                             | 34,926(88.7) | 667(84.0) | <0.0001         |
|       | Yes                            | 4466(11.3)   | 127(16.0) |                 |
|       | Tooth brushing                 |              |           |                 |
|       | <3                             | 20,544(52.2) | 454(57.2) | 0.005           |
|       | ≥3                             | 18,848(47.9) | 340(42.8) |                 |
|       | Oral examination within 1 year |              |           |                 |
|       | No                             | 27,630(70.1) | 603(75.9) | 0.0004          |
|       | Yes                            | 11,762(29.9) | 191(24.1) |                 |

\* Rheumatoid arthritis.

**Table S2.** Odds ratios of self-perceived oral health according to rheumatoid arthritis excluding the person with the complete dentures.

|       |              | Model1 <sup>†</sup> | Model2 <sup>‡</sup>             | Model3 <sup>§</sup>             |
|-------|--------------|---------------------|---------------------------------|---------------------------------|
| Total |              | 1.213(1.1–1.337)    | 1.108(1.005–1.223)              | 1.108(1.004–1.223)              |
| Sex   |              |                     |                                 |                                 |
|       | Men          | 1.22(0.985–1.511)   | 1.139(0.92–1.411) <sup>a</sup>  | 1.14(0.92–1.412) <sup>b</sup>   |
|       | Women        | 1.233(1.105–1.377)  | 1.103(0.987–1.232) <sup>a</sup> | 1.102(0.987–1.232) <sup>b</sup> |
| Age   |              |                     |                                 |                                 |
|       | 20–39        | 1.044(0.693–1.573)  | 1.047(0.695–1.578)              | 1.048(0.695–1.579)              |
|       | 40–59        | 1.175(0.985–1.401)  | 1.205(1.01–1.35)                | 1.207(1.012–1.44)               |
|       | 60–79        | 1.104(0.973–1.254)  | 1.109(0.976–1.26)               | 1.107(0.974–1.258)              |
|       | ≥80          | 0.914(0.546–1.529)  | 0.903(0.54–1.512)               | 0.907(0.542–1.519)              |
|       | House income |                     |                                 |                                 |
|       | Low          | 1.129(0.996–1.281)  | 1.073(0.945–1.218)              | 1.071(0.944–1.216)              |
|       | High         | 1.249(1.07–1.458)   | 1.158(0.991–1.354)              | 1.164(0.996–1.36)               |
|       | Education    |                     |                                 |                                 |

|                                |                    |                                 |                                 |
|--------------------------------|--------------------|---------------------------------|---------------------------------|
| High school or below           | 1.16(1.048–1.285)  | 1.113(1.004–1.234)              | 1.113(1.004–1.233)              |
| College or above               | 1.067(0.761–1.495) | 1.009(0.719–1.415)              | 1.013(0.722–1.421)              |
| Smoking                        |                    |                                 |                                 |
| No                             | 1.258(1.134–1.395) | 1.114(1.003–1.236) <sup>‡</sup> | 1.113(1.003–1.236) <sup>‡</sup> |
| Yes                            | 1.17(0.875–1.564)  | 1.049(0.783–1.405) <sup>‡</sup> | 1.048(0.783–1.404) <sup>‡</sup> |
| Diabetes mellitus              |                    |                                 |                                 |
| No                             | 1.195(1.072–1.332) | 1.089(0.976–1.215)              | -                               |
| Yes                            | 1.211(0.97–1.511)  | 1.206(0.965–1.509)              | -                               |
| Tooth brushing                 |                    |                                 |                                 |
| <3                             | 1.166(1.027–1.323) | 1.111(0.978–1.262)              | 1.108(0.975–1.258)              |
| ≥3                             | 1.26(1.081–1.469)  | 1.102(0.944–1.286)              | 1.106(0.948–1.291)              |
| Oral examination within 1 year |                    |                                 |                                 |
| No                             | 1.211(1.085–1.352) | 1.108(0.992–1.238)              | 1.107(0.99–1.237)               |
| Yes                            | 1.178(0.954–1.454) | 1.091(0.883–1.349)              | 1.095(0.886–1.354)              |

† Crude odds ratio was calculated by Poisson analysis; ‡ Adjusted odds ratio was calculated by Poisson analysis after adjusting for sex, age and smoking; § Adjusted odds ratio was calculated by Poisson analysis after adjusting for sex, age, smoking and diabetes mellitus; <sup>a</sup> Adjusted for age, smoking; <sup>b</sup> Adjusted for age, smoking and diabetes mellitus; <sup>c</sup> Adjusted for sex, age; <sup>d</sup> Adjusted for sex, age and diabetes mellitus.

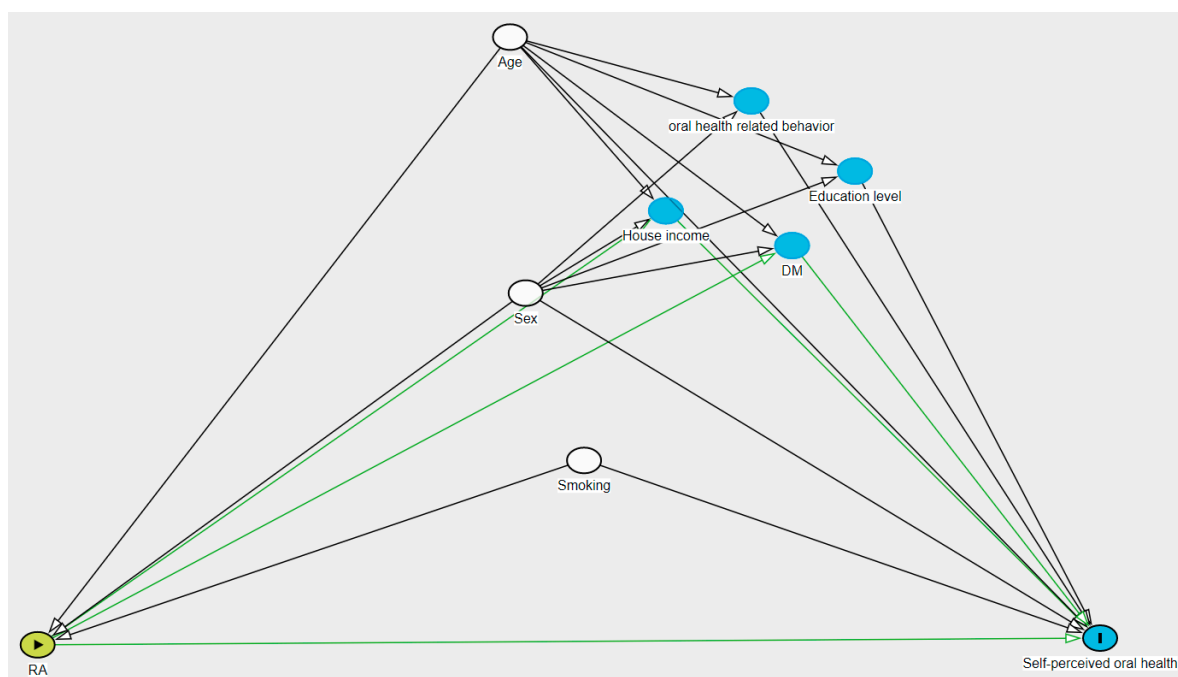

**Figure S1.** Directed acyclic graphs for variable selection.

Directed acyclic graphs (DAGs) to show the hypothesized causal associations among rheumatoid arthritis (RA) (yellow-green circle), self-perceived oral health ("I" in a blue circle), and covariates. The proposed adjustment variable using the DAGitty is indicated by white circles. Ancestor variables of the outcome and not proposed adjustment variables are indicated by blue circles.
